# Supplementary material for: TDP-43 pathology in Drosophila induces glial-cell type specific toxicity that can be ameliorated by knock-down of SF2/SRSF1
Source: PubMed Central journal article supplement — bioRxiv. 2023 May 5:2023.05.04.539439. Preprint. [Version 1] doi: 10.1101/2023.05.04.539439 (PMC10187300; doi:10.1101/2023.05.04.539439), 2023-05-05
Supplement: NIHPP2023.05.04.539439v1-supplement-7.pdf [file NIHPP2023.05.04.539439v1-supplement-7.pdf]

## Supplemental Figures

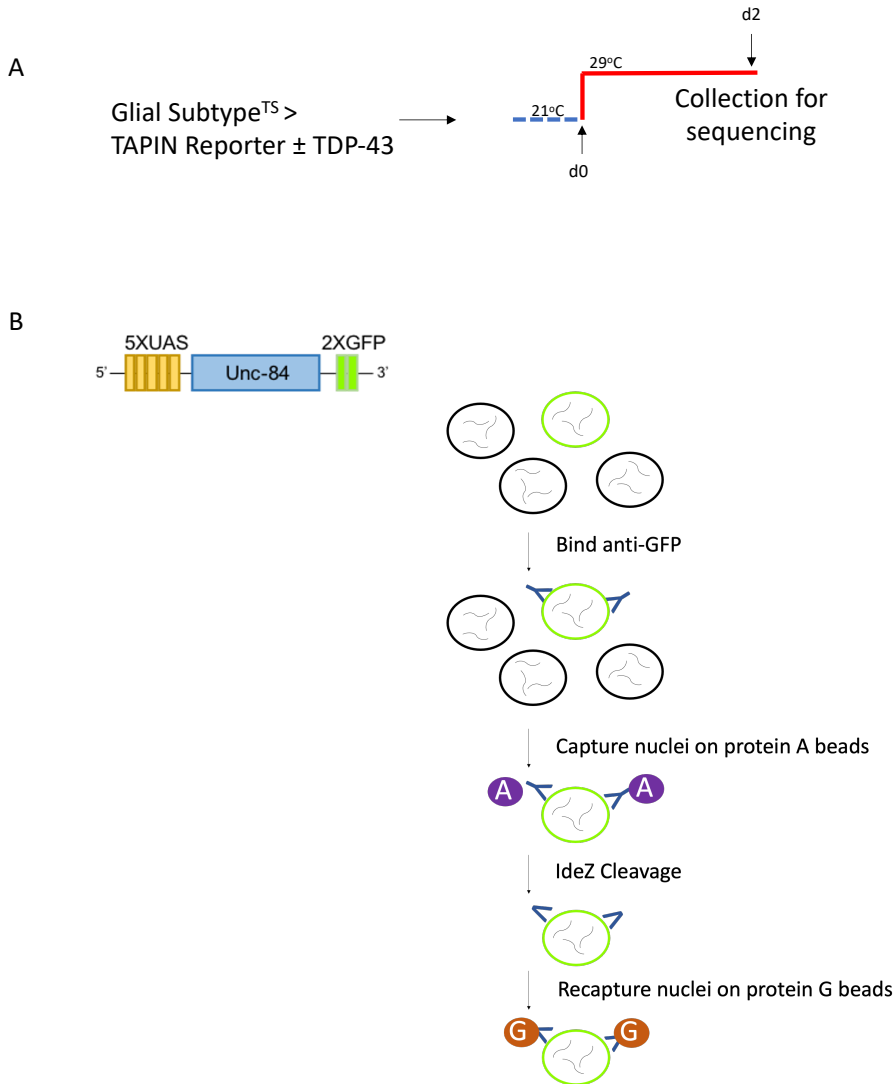

**Figure S1. Nuclear RNA-seq Schematic.** Flies expressing UAS-TDP-43 and the INTACT reporter (5XUAS-unc84-2XGFP) under control of a temperatures sensitive Gal80 plus a glial cell-type-specific Gal4 (methods) were (A) reared at 21°C and shifted to 29°C upon eclosion (day 0). Heads were collected for sequencing on day 2 and stored at -80°C until use. (B) schematic of the INTACT nuclear tag used to purify nuclei and schematic of the tandem affinity purification process.

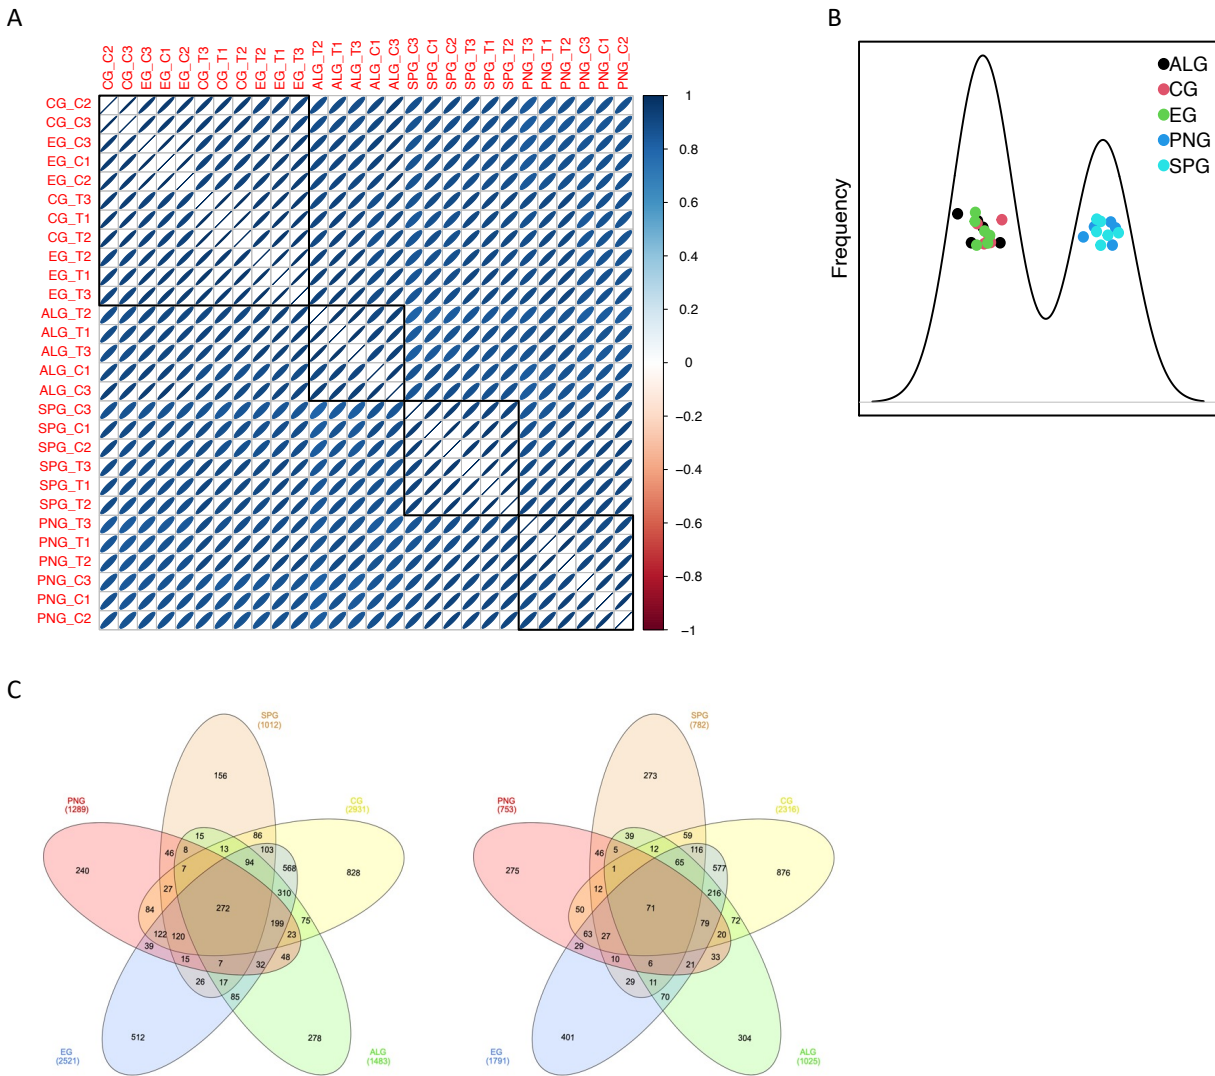

**Figure S2. Gene expression profiles; overlap, PCA, and correlation plots.** Gene expression profiles generated from (A) Pearson correlation analysis demonstrating EG and CG more closely resemble each other at baseline than they do their own cell type with TDP-43 expression (B) principle component analysis plot demonstrating PNG and SPG separate from other glial cell types. (C) upregulated and downregulated genes (p<.05) in a given glial cell type and their overlap with other glial cell types.

| <b>Glial Subtype</b> | <b>Cells/ Brain<sup>1</sup></b> | <b>Cells/ Group (n=6)</b> | <b>Flies/ Group (n=6)</b> |
|----------------------|---------------------------------|---------------------------|---------------------------|
| PNG                  | 2246                            | >1,000,000                | >445                      |
| SPG                  | 300                             | >300,000                  | >1,000                    |
| CG                   | 2635                            | >1,000,000                | >380                      |
| ALG                  | 4618                            | >1,000,000                | >217                      |
| EG                   | 3722                            | >1,000,000                | >267                      |

**Table S1. Numbers of fly heads used for TAPIN purification and sequencing based on number of glial cells of each type per brain.<sup>1</sup>Kremer et al., 2017**

**Table S2. Statistically significant differentially expressed features.**  
(see excel sheet)

**Table S3. Statistically significant differentially expressed TEs**  
(see excel sheet)

**Table S4. DNA damage and repair pathways.**  
(see excel sheet)

**Table S5. Chromatin organization pathway**  
(see excel sheet)

**Table S6. nucleocytoplasmic transport pathway**  
(see excel sheet)

**Table S7. inflammatory response pathways**  
(see excel sheet)

| Metric                  | PNG <sup>ls</sup> Control<br>(n=3) | PNG <sup>ls</sup> + TDP-43<br>(n=3) | SPG <sup>ls</sup> Control<br>(n=3) | SPG <sup>ls</sup> + TDP-43<br>(n=3) | CG <sup>ls</sup> Control<br>(n=2) | CG <sup>ls</sup> + TDP-43<br>(n=3) | ALG <sup>ls</sup> Control<br>(n=2) | ALG <sup>ls</sup> + TDP-43<br>(n=3) | EG <sup>ls</sup> Control<br>(n=3) | EG <sup>ls</sup> + TDP-43<br>(n=3) |
|-------------------------|------------------------------------|-------------------------------------|------------------------------------|-------------------------------------|-----------------------------------|------------------------------------|------------------------------------|-------------------------------------|-----------------------------------|------------------------------------|
| SF2 expression<br>(MRN) | 899                                | 363                                 | 1090                               | 594                                 | 780                               | 727                                | 591                                | 453                                 | 780                               | 669                                |
| Log2 fold change        | -1.31                              |                                     | -0.85                              |                                     | n/a                               |                                    | n/a                                |                                     | n/a                               |                                    |
| p                       | <0.0001                            |                                     | <0.001                             |                                     | n/a                               |                                    | n/a                                |                                     | n/a                               |                                    |

**Table S8. SF2 expression across glial cell types.** SF2 expression was significantly reduced at day 2 post induction of TDP-43 in SPG and PNG day 2.
